# Supplementary material for: Nitrogen Isotope Sclerochronology—Insights Into Coastal Environmental Conditions and Pinna nobilis Ecology
Source: Frontiers journal article supplement (doi:10.3389/fmars.2021.816879), 2022-01-27
Supplement: Table_1.xlsx [file Table_1.xlsx]

## Sheet: inner shell surface
Data file_nitrogen stable istopes in Pinna nobilis_inner shell surface
ID	Location	Notes	d15N	%N
KAPNL2	Kaštela Bay	Line 1	7.5498	0.233965
KAPNL2	Kaštela Bay	Line 2	7.3064	0.214393
KAPNL2	Kaštela Bay	Line 3	7.4121	0.198541
KAPNL3	Kaštela Bay	Line 1	6.85684	0.30228
KAPNL3	Kaštela Bay	Line 2	6.89877	0.240854
KAPNL3	Kaštela Bay	Line 3	6.93262	0.269182
KAPNL1	Kaštela Bay	Line 1	6.24736	0.321354
KAPNL1	Kaštela Bay	Line 2	6.1916	0.271519
KAPNL1	Kaštela Bay	Line 3	6.05111	0.278134
KAPNL4	Kaštela Bay	Line 1	7.80337	0.357267
KAPNL4	Kaštela Bay	Line 2	7.77885	0.358101
KAPNL4	Kaštela Bay	Line 3	7.96034	0.281779
PNMSL1	Mali Ston Bay	Line 1	5.43289	0.309665
PNMSL1	Mali Ston Bay	Line 2	5.48598	0.302002
PNMSL1	Mali Ston Bay	Line 3	5.43723	0.346819
PNMSL3	Mali Ston Bay	Line 1	5.96066	0.290331
PNMSL3	Mali Ston Bay	Line 2	5.8278	0.265767
PNMSL3	Mali Ston Bay	Line 3	5.67975	0.281928
PNMSL2	Mali Ston Bay	Line 1	5.88582	0.269226
PNMSL2	Mali Ston Bay	Line 2	5.93183	0.317811
PNMSL2	Mali Ston Bay	Line 3	5.91306	0.303137
PNISL2	Lim Bay	Line 1	6.49491	0.734603
PNISL2	Lim Bay	Line 2	6.4953	0.374206
PNISL2	Lim Bay	Line 3	6.83698	0.46889
PNISL1	Lim Bay	Line 1	6.60891	0.62965
PNISL1	Lim Bay	Line 2	6.94305	0.302788
PNISL1	Lim Bay	Line 3	6.92839	0.367094
PNISL3	Lim Bay	Line 1	7.61482	0.464913
PNISL3	Lim Bay	Line 2	7.77247	0.255313
PNISL3	Lim Bay	Line 3	7.669	0.320726
PAG1	Pag Bay	Line 1	3.81298	0.335082
PAG1	Pag Bay	Line 2	3.87055	0.351497
PAG1	Pag Bay	Line 3	3.7358	0.341122
PAG2	Pag Bay	Line 1	3.06296	0.426961
PAG2	Pag Bay	Line 2	3.16989	0.430075
PAG2	Pag Bay	Line 3	3.74755	0.425021
PAG3	Pag Bay	Line 1	3.83265	0.296464
PAG3	Pag Bay	Line 2	3.82268	0.275682
PAG3	Pag Bay	Line 3	4.47332	0.291581

## Sheet: external shell surface
Data file_nitrogen stable istopes in Pinna nobilis_external shell surface
ID	Location	Sample ID from shell edge	d15N	%N
Kas4†	Kaštela Bay	1	5.34299	0.39902
Kas4†	Kaštela Bay	2	5.34909	0.50308
Kas4†	Kaštela Bay	3	5.40626	0.485847
Kas4†	Kaštela Bay	4	5.68487	0.419609
Kas4†	Kaštela Bay	5	5.74162	0.308706
Kas4†	Kaštela Bay	6	5.73845	0.383022
Kas4†	Kaštela Bay	7	5.53477	0.418484
Kas4†	Kaštela Bay	8	5.46787	0.45727
Kas4†	Kaštela Bay	9	5.32538	0.448854
Kas4†	Kaštela Bay	10	5.21662	0.481199
Kas4†	Kaštela Bay	11	5.32266	0.482726
Kas4†	Kaštela Bay	12	5.36562	0.511331
Kas4†	Kaštela Bay	13	5.41192	0.491481
Kas4†	Kaštela Bay	14	5.36406	0.469931
Kas4†	Kaštela Bay	15	5.50286	0.532642
Kas4†	Kaštela Bay	16	5.5523	0.546656
Lim1	Lim Bay	1	6.6558	0.470453
Lim1	Lim Bay	2	6.52378	0.545018
Lim1	Lim Bay	3	6.46122	0.545805
Lim1	Lim Bay	4	6.28596	0.611468
Lim1	Lim Bay	5	6.07572	0.671813
Lim1	Lim Bay	6	6.32535	0.434277
Lim1	Lim Bay	7	6.86432	0.448536
Lim1	Lim Bay	8	7.12342	0.327543
Lim1	Lim Bay	9	7.25554	0.394033
Lim1	Lim Bay	10	7.39566	0.44418
Lim1	Lim Bay	11	7.55473	0.434746
Lim1	Lim Bay	12	7.64474	0.532342
Lim1	Lim Bay	13	7.84465	0.426958
Lim1	Lim Bay	14	7.80943	0.48717
Lim1	Lim Bay	15	7.34593	0.377975
Lim1	Lim Bay	16	6.93004	0.378539
Lim2	Lim Bay	1	6.48047	0.476006
Lim2	Lim Bay	2	6.28766	0.431373
Lim2	Lim Bay	3	5.88253	0.475564
Lim2	Lim Bay	4	5.63415	0.488667
Lim2	Lim Bay	5	5.65233	0.500218
Lim2	Lim Bay	6	5.90635	0.47309
Lim2	Lim Bay	7	6.1827	0.443313
Lim2	Lim Bay	8	6.14634	0.452998
Lim2	Lim Bay	9	6.50982	0.487158
Lim2	Lim Bay	10	6.86775	0.432446
Lim2	Lim Bay	11	6.35501	0.500387
Lim2	Lim Bay	12	6.5426	0.502479
Lim2	Lim Bay	13	6.5588	0.462517
Lim2	Lim Bay	14	6.3941	0.411752
Sto1	Mali Ston Bay	1	3.57133	0.36232
Sto1	Mali Ston Bay	2	3.67861	0.350102
Sto1	Mali Ston Bay	3	3.64715	0.289075
Sto1	Mali Ston Bay	4	3.8322	0.326686
Sto1	Mali Ston Bay	5	3.95655	0.362771
Sto1	Mali Ston Bay	6	4.17461	0.395963
Sto1	Mali Ston Bay	7	4.41195	0.403241
Sto1	Mali Ston Bay	8	4.57313	0.371114
Sto1	Mali Ston Bay	9	4.87495	0.359273
Sto1	Mali Ston Bay	10	4.75804	0.335961
Sto1	Mali Ston Bay	11	4.60868	0.343723
Sto1	Mali Ston Bay	12	4.73832	0.260986
Sto1	Mali Ston Bay	13	4.69313	0.295227
Sto1	Mali Ston Bay	14	4.5252	0.307175
Sto1	Mali Ston Bay	15	4.21742	0.308396
Sto1	Mali Ston Bay	16	4.26122	0.348513
Sto1	Mali Ston Bay	17	4.48796	0.315415
Sto3	Mali Ston Bay	1	4.43511	0.454207
Sto3	Mali Ston Bay	2	4.56172	0.513971
Sto3	Mali Ston Bay	3	4.63505	0.537703
Sto3	Mali Ston Bay	4	4.6301	0.520843
Sto3	Mali Ston Bay	5	4.63108	0.437796
Sto3	Mali Ston Bay	6	4.49976	0.494438
Sto3	Mali Ston Bay	7	4.58238	0.528418
Sto3	Mali Ston Bay	8	4.57833	0.323551
Sto3	Mali Ston Bay	9	4.42991	0.38998
Sto3	Mali Ston Bay	10	3.89553	0.281079
Sto3	Mali Ston Bay	11	3.49253	0.304619
Sto3	Mali Ston Bay	12	3.45679	0.402077
Sto3	Mali Ston Bay	13	3.43143	0.417859
Sto3	Mali Ston Bay	14	3.42655	0.398982
Sto3	Mali Ston Bay	15	3.53267	0.378476
Sto3	Mali Ston Bay	16	3.61788	0.370768
Sto3	Mali Ston Bay	17	3.70159	0.393676
Kas1	Kaštela Bay	1	9.94121	0.361926
Kas1	Kaštela Bay	2	9.81851	0.325852
Kas1	Kaštela Bay	3	8.35144	0.329472
Kas1	Kaštela Bay	4	6.48924	0.390822
Kas1	Kaštela Bay	5	5.98983	0.382887
Kas1	Kaštela Bay	6	5.41089	0.356626
Kas1	Kaštela Bay	7	5.27538	0.364473
Kas1	Kaštela Bay	8	4.87983	0.38456
Kas1	Kaštela Bay	9	4.74971	0.280715
Kas1	Kaštela Bay	10	4.74794	0.330762
Kas1	Kaštela Bay	11	5.6025	0.381347
Kas1	Kaštela Bay	12	5.22774	0.408275
Kas1	Kaštela Bay	13	5.05258	0.403876
Kas1	Kaštela Bay	14	5.02899	0.373965
Kas1	Kaštela Bay	15	5.12597	0.353366
Kas1	Kaštela Bay	16	5.36425	0.431642
Kas1	Kaštela Bay	17	5.01222	0.39319
Kas1	Kaštela Bay	18	4.86068	0.40557
Kas1	Kaštela Bay	19	4.52539	0.384761
Kas1	Kaštela Bay	20	4.45655	0.460465
Kas1	Kaštela Bay	21	4.45255	0.41869
Kas1	Kaštela Bay	22	4.60126	0.485735
Kas1	Kaštela Bay	23	4.71523	0.472726
Kas1	Kaštela Bay	24	4.48496	0.499125
Kas1	Kaštela Bay	25	4.52942	0.499926
Kas1	Kaštela Bay	26	4.70995	0.455116
Kas1	Kaštela Bay	27	4.89179	0.483855
Kas1	Kaštela Bay	28	5.14124	0.432414
Kas1	Kaštela Bay	29	5.19134	0.408634
Kas1	Kaštela Bay	30	5.15781	0.403161
Kas1	Kaštela Bay	31	5.24531	0.376368
Kas1	Kaštela Bay	32	5.2279	0.377513
Kas1	Kaštela Bay	33	5.20449	0.357348
Kas1	Kaštela Bay	34	5.16395	0.289054
Kas1	Kaštela Bay	35	5.21956	0.351982
Kas1	Kaštela Bay	36	5.10603	0.363588
Kas1	Kaštela Bay	37	5.18446	0.347904
Kas1	Kaštela Bay	38	5.13889	0.377861
Kas1	Kaštela Bay	39	5.08959	0.366663
Kas1	Kaštela Bay	40	4.99555	0.395101
