# Supplementary material for: Nitrogen Isotope Sclerochronology—Insights Into Coastal Environmental Conditions and Pinna nobilis Ecology
Source: Frontiers journal article supplement (doi:10.3389/fmars.2021.816879), 2022-01-27
Supplement: Table_2.xlsx [file Table_2.xlsx]

## Sheet: Oxygen and carbon
Data file_oxygen and carbon stable istopes in Pinna nobilis_external shell surface
Lim1	δ18O	δ13C		Lim3	δ18O	δ13C		Kas1	δ18O	δ13C		Kas4†	δ18O	δ13C		Ston1	δ18O	δ13C		Ston3	δ18O	δ13C
1	1.95245	1.2649		1	0.883773	-0.654006		1	-0.030778	-1.00269		1	0.907456	-1.02974		1	1.24897	-0.881186		1	2.2663	-0.207991
2	1.80647	1.11223		2	1.24448	0.0271788		2	0.337231	-0.827097		2	-0.307759	-1.69226		2	-0.00913328	-1.14646		2	1.77802	-0.419845
3	1.85558	1.12198		3	1.24154	0.00509663		3	0.139099	-1.00877		3	1.27294	-0.149673		3	0.0778768	-0.940717		3	0.772119	-0.939953
4	1.95854	1.16671		4	0.554794	-1.05406		4	-0.207323	-1.31587		4	1.39338	0.0304792		4	0.296134	-1.03241		4	0.226719	-0.867877
5	1.92896	1.13902		5	-0.272846	-2.13486		5	0.342996	-1.46964		5	1.34723	0.0360429		5	0.186161	-1.00292		5	1.40513	-0.347321
6	3.36839	0.884124		6	3.14327	0.923356		6	0.712814	-1.00956		6	1.27092	-0.152343		6	1.06358	-0.0829087		6	0.0995979	-0.939729
7	3.01412	0.858567		7	3.49562	0.741206		7	0.314061	-1.48291		7	1.22364	-0.0711137		7	1.01844	-0.0317228		7	0.119016	-1.25347
8	2.9982	1.00003		8	1.91948	-0.224132		8	0.341639	-1.16794		8	1.26743	-0.108168		8	1.35658	-0.109058		8	0.215542	-0.832008
9	2.89298	0.965054		9	2.20545	-0.0464658		9	1.63058	-0.101086		9	2.17648	0.206292		9	1.73512	-0.0842439		9	1.7428	-0.51602
10	3.06074	0.918648		10	0.089776	-1.42677		10	2.102	0.208486		10	1.94077	0.296646		10	1.63224	-0.0500829		10	1.95854	-0.160688
11	4.01562	0.389559		11	0.483557	-0.96394		11	2.43147	0.474525		11	2.03093	0.254696		11	2.45957	-0.365878		11	1.51644	-0.101951
12	4.17253	0.728944		12	0.508168	-0.567358		12	2.3909	0.380483		12	2.05761	0.271053		12	2.05964	-0.657192		12	2.00788	-0.171336
13	3.87503	0.690332		13	0.718832	-0.186357		13	2.30997	0.472612		13	1.61007	0.368862		13	2.26112	-0.339172		13	2.36914	-0.209672
14	1.21779	-0.182387		14	0.428012	-0.181985		14	2.68374	0.224459		14	1.48985	0.370198		14	2.35714	-0.518768		14	1.71356	-0.0270738
15	-0.145558	-0.714164						15	2.99829	-0.133484		15	1.49627	0.421383		15	2.64304	-0.281198		15	1.99557	-0.203283
16	0.557952	0.0347076						16	2.99479	0.10747		16	1.40318	0.345495		16	2.85072	-0.322481		16	2.65534	-0.444729
								17	2.981	0.134467						17	2.69966	-0.329491		17	2.80865	-0.444841
								18	3.10295	0.270243
								19	2.87962	0.284417
								20	2.94325	0.339987
								21	2.72601	0.330987
								22	2.56269	0.27688
								23	2.61344	0.428066
								24	2.67911	0.547418
								25	2.09296	0.139867
								26	2.09556	0.193862
								27	2.13614	0.319288
								28	1.69059	0.188463
								29	1.87087	0.208711
								30	1.89822	0.290716
								31	1.75784	0.282167
								32	1.46013	0.150891
								33	0.632792	-0.235062
								34	0.30954	-0.322017
								35	0.202958	-0.20289
								36	0.212339	-0.183204
								37	0.123953	-0.245749
								38	-0.118824	-0.0873627
								39	-0.0258049	-0.0638523
								40	0.0825861	-0.072739
								41	0.333728	-0.0735264
								42	0.459298	0.0375011
								43	0.392162	-0.00726986
								44	0.478287	0.0339015
								45	0.876813	0.00240427
								46	0.638104	-0.574894
